# Supplementary material
Source: PubMed Central journal article supplement (PMC7166192)
Supplement: NIHMS1569862-supplement-1.pdf [file NIHMS1569862-supplement-1.pdf]

**Table S1. Major autophagy- and ferroptosis-associated compounds, Related to Figures 1 and 3.**

| <b>Compound</b>            | <b>Mode of Action</b>            | <b>Target Point</b> | <b>Category</b>     |
|----------------------------|----------------------------------|---------------------|---------------------|
| 3-Methyladenine            | PI3 kinase inhibitor             | Autophagosome       | Autophagy inhibitor |
| Wortmannin                 | PI3 kinase inhibitor             | Autophagosome       | Autophagy inhibitor |
| LY294002                   | PI3 kinase inhibitor             | Autophagosome       | Autophagy inhibitor |
| SBI-0206965                | ULK1 inhibitor                   | Autophagosome       | Autophagy inhibitor |
| MRT 67307                  | ULK1 inhibitor                   | Autophagosome       | Autophagy inhibitor |
| MRT 68921                  | ULK1 inhibitor                   | Autophagosome       | Autophagy inhibitor |
| Spautin-1                  | USP10 and USP13 inhibitor        | Autophagosome       | Autophagy inhibitor |
| NSC185058                  | ATG4 inhibitor                   | Autophagosome       | Autophagy inhibitor |
| Tioconazole                | ATG4 inhibitor                   | Autophagosome       | Autophagy inhibitor |
| N-ethylmaleimide           | ATG4 inhibitor                   | Autophagosome       | Autophagy inhibitor |
| WZ4003                     | AMPK inhibitor                   | Autophagosome       | Autophagy inhibitor |
| Compound C                 | AMPK inhibitor                   | Autophagosome       | Autophagy inhibitor |
| HTH-01-015                 | AMPK inhibitor                   | Autophagosome       | Autophagy inhibitor |
| Nocodazole                 | Microtubule inhibitor            | Autolysosome        | Autophagy inhibitor |
| Vinblastine                | Microtubule inhibitor            | Autolysosome        | Autophagy inhibitor |
| Bafilomycin A <sub>1</sub> | H <sup>+</sup> -ATPase inhibitor | Autolysosome        | Autophagy inhibitor |
| Concanamycin A             | H <sup>+</sup> -ATPase inhibitor | Autolysosome        | Autophagy inhibitor |
| E64d                       | Cathepsin inhibitor              | Autolysosome        | Autophagy inhibitor |
| Pepstatin A                | Protease inhibitor               | Autolysosome        | Autophagy inhibitor |
| Chloroquine                | Lysosomotropic agent             | Autolysosome        | Autophagy inhibitor |
| Hydroxychloroquine         | Lysosomotropic agent             | Autolysosome        | Autophagy inhibitor |
| Simvastatin                | AMPK activator                   | Autophagosome       | Autophagy activator |
| A769662                    | AMPK activator                   | Autophagosome       | Autophagy activator |
| Metformin                  | AMPK activator                   | Autophagosome       | Autophagy activator |
| Resveratrol                | AMPK activator                   | Autophagosome       | Autophagy activator |
| AICAR                      | AMPK activator                   | Autophagosome       | Autophagy activator |
| PT1                        | AMPK activator                   | Autophagosome       | Autophagy activator |
| Rapamycin                  | MTOR inhibitor                   | Autophagosome       | Autophagy activator |
| Torin1 and Torin2          | MTOR inhibitor                   | Autophagosome       | Autophagy activator |
| Everolimus                 | MTOR inhibitor                   | Autophagosome       | Autophagy activator |
| Temsirolimus               | MTOR inhibitor                   | Autophagosome       | Autophagy activator |
| A23187                     | ER stress inducer                | Autophagosome       | Autophagy activator |
| Brefeldin A                | ER stress inducer                | Autophagosome       | Autophagy activator |
| Thapsigargin               | ER stress inducer                | Autophagosome       | Autophagy activator |
| Tunicamycin                | ER stress inducer                | Autophagosome       | Autophagy activator |

|                           |                                  |                    |                       |
|---------------------------|----------------------------------|--------------------|-----------------------|
| Vitamin E                 | Antioxidant                      | Lipid peroxidation | Ferroptosis inhibitor |
| Ferrostatin-1             | Antioxidant                      | Lipid peroxidation | Ferroptosis inhibitor |
| UAMC-3203                 | Antioxidant                      | Lipid peroxidation | Ferroptosis inhibitor |
| Liproxstatin-1            | Antioxidant                      | Lipid peroxidation | Ferroptosis inhibitor |
| CoQ10                     | Antioxidant                      | Lipid peroxidation | Ferroptosis inhibitor |
| Idebenone                 | Antioxidant                      | Lipid peroxidation | Ferroptosis inhibitor |
| Ebselen                   | Antioxidant                      | Lipid peroxidation | Ferroptosis inhibitor |
| BHT                       | Antioxidant                      | Lipid peroxidation | Ferroptosis inhibitor |
| Trolox                    | Antioxidant                      | Lipid peroxidation | Ferroptosis inhibitor |
| XJB-5-131                 | Antioxidant                      | Lipid peroxidation | Ferroptosis inhibitor |
| N-acetyl-cysteine         | Antioxidant                      | Lipid peroxidation | Ferroptosis inhibitor |
| Baicalein                 | Lipoxygenase inhibitor           | Lipid peroxidation | Ferroptosis inhibitor |
| PD-146176                 | Lipoxygenase inhibitor           | Lipid peroxidation | Ferroptosis inhibitor |
| AA-861                    | Lipoxygenase inhibitor           | Lipid peroxidation | Ferroptosis inhibitor |
| Zileuton                  | Lipoxygenase inhibitor           | Lipid peroxidation | Ferroptosis inhibitor |
| Nordihydroguaiaretic acid | Lipoxygenase inhibitor           | Lipid peroxidation | Ferroptosis inhibitor |
| Rosiglitazone             | ACSL4 inhibitor                  | Lipid peroxidation | Ferroptosis inhibitor |
| TOFA                      | Acetyl-CoA carboxylase inhibitor | Lipid peroxidation | Ferroptosis inhibitor |
| Beta-mercaptoethanol      | Reducing agent                   | Lipid peroxidation | Ferroptosis inhibitor |
| SRS16-86                  | Increase GSH production          | Lipid peroxidation | Ferroptosis inhibitor |
| SRS11-92                  | Increase GSH production          | Lipid peroxidation | Ferroptosis inhibitor |
| Dopamine                  | GPX4 degradation inhibitor       | Lipid peroxidation | Ferroptosis inhibitor |
| Selenium                  | GPX4 activator                   | Lipid peroxidation | Ferroptosis inhibitor |
| GSH                       | GPX4 activator                   | Lipid peroxidation | Ferroptosis inhibitor |
| Vildagliptin              | DPP4 inhibitor                   | Lipid peroxidation | Ferroptosis inhibitor |
| Alogliptin                | DPP4 inhibitor                   | Lipid peroxidation | Ferroptosis inhibitor |
| Linagliptin               | DPP4 inhibitor                   | Lipid peroxidation | Ferroptosis inhibitor |
| YM-53601                  | Squalene synthase inhibitor      | Lipid peroxidation | Ferroptosis inhibitor |
| Zaragozic acid A          | Squalene synthase inhibitor      | Lipid peroxidation | Ferroptosis inhibitor |
| K252a                     | Phosphorylase kinase inhibitor   | Lipid peroxidation | Ferroptosis inhibitor |
| 7-Oxo staurosporine       | Phosphorylase kinase inhibitor   | Lipid peroxidation | Ferroptosis inhibitor |
| Thiazolidinediones        | Acyl-CoA synthetase inhibitor    | Lipid peroxidation | Ferroptosis inhibitor |
| Deferoxamine              | Iron chelator                    | Iron accumulation  | Ferroptosis inhibitor |

|                                                                   |                                     |                              |                       |
|-------------------------------------------------------------------|-------------------------------------|------------------------------|-----------------------|
| Cyclipirox                                                        | Iron chelator                       | Iron accumulation            | Ferroptosis inhibitor |
| Deferasirox                                                       | Iron chelator                       | Iron accumulation            | Ferroptosis inhibitor |
| Erastin                                                           | System $x_c^-$ inhibitor            | GSH production               | Ferroptosis activator |
| Sulfasalazine                                                     | System $x_c^-$ inhibitor            | GSH production               | Ferroptosis activator |
| Sorafenib                                                         | System $x_c^-$ inhibitor            | GSH production               | Ferroptosis activator |
| Glutamate                                                         | System $x_c^-$ inhibitor            | GSH production               | Ferroptosis activator |
| Buthionine sulfoximine                                            | Glutamate-cysteine ligase inhibitor | GSH production               | Ferroptosis activator |
| Artesunate                                                        | Decreases intracellular GSH levels  | GSH production               | Ferroptosis activator |
| Artemisinin                                                       | Decreases intracellular GSH levels  | GSH production               | Ferroptosis activator |
| Acetaminophen                                                     | Decreases intracellular GSH levels  | GSH production               | Ferroptosis activator |
| N-Acetyl-4-benzoquinone imine                                     | Decreases intracellular GSH levels  | GSH production               | Ferroptosis activator |
| BAY 87-2243                                                       | Mitochondrial complex I inhibition  | Mitochondrial ROS production | Ferroptosis activator |
| RSL3                                                              | GPX4 inhibitor                      | Lipid repair                 | Ferroptosis activator |
| FIN56                                                             | GPX4 inhibitor                      | Lipid repair                 | Ferroptosis activator |
| Withaferin A                                                      | GPX4 inhibitor                      | Lipid repair                 | Ferroptosis activator |
| FINO2                                                             | GPX4 inhibitor                      | Lipid repair                 | Ferroptosis activator |
| ML162                                                             | GPX4 inhibitor                      | Lipid repair                 | Ferroptosis activator |
| ML210                                                             | GPX4 inhibitor                      | Lipid repair                 | Ferroptosis activator |
| iFSP1                                                             | AIFM2/FSP1 inhibitor                | Lipid repair                 | Ferroptosis activator |
| Fluvastatin                                                       | HMGCR/HMG-CoA reductase inhibitor   | Lipid synthesis              | Ferroptosis activator |
| Lovastatin                                                        | HMGCR/HMG-CoA reductase inhibitor   | Lipid synthesis              | Ferroptosis activator |
| Simvastatin                                                       | HMGCR/HMG-CoA reductase inhibitor   | Lipid synthesis              | Ferroptosis activator |
| Hemoglobin                                                        | N/A                                 | Iron accumulation            | Ferroptosis activator |
| FeCl <sub>2</sub>                                                 | N/A                                 | Iron accumulation            | Ferroptosis activator |
| Hemin                                                             | N/A                                 | Iron accumulation            | Ferroptosis activator |
| (NH <sub>4</sub> ) <sub>2</sub> Fe(SO <sub>4</sub> ) <sub>2</sub> | N/A                                 | Iron accumulation            | Ferroptosis activator |
| Trigonelline                                                      | NFE2L2 inhibitor                    | Antioxidant gene expression  | Ferroptosis activator |
| Brusatol                                                          | NFE2L2 inhibitor                    | Antioxidant gene expression  | Ferroptosis activator |
